# Supplementary material for: Non-tuberculous mycobacterial infections in patients with end-stage renal disease: Prevalence, risk factors, and mortality
Source: HighWire-hosted journal article supplement (doi:10.1136/jim-2022-002462), 2022-10-24
Supplement: jim-2022-002462supp001_data_supplement.pdf [file jim-2022-002462supp001_data_supplement.pdf]

**SUPPLEMENTARY MATERIAL****Table 1**

|                                | <b>ICD-9 Codes</b>                       | <b>ICD-10 Codes</b>                                                                |
|--------------------------------|------------------------------------------|------------------------------------------------------------------------------------|
| Pulmonary NTM                  | A31.0                                    | 031.0                                                                              |
| Cutaneous NTM                  | A31.1                                    | 031.1                                                                              |
| Disseminated MAC               | A31.2                                    | 031.2                                                                              |
| Other specified NTM            | A31.8                                    | 031.8                                                                              |
| Unspecified NTM                | A31.9                                    | 031.9                                                                              |
| HIV status                     | 042                                      | B20                                                                                |
| Chronic lung disease           | 491, 492, 496, 484                       | J41, J42, J43, J44, J47                                                            |
| History of cancer              | 140-172, 174-195, 200-208                | C0, C1, C2, C3, C40, C41, C43, C4A, C45-C49, C5, C6, C70-C76, C80, C7A, C81-C96    |
| Diabetes mellitus              | 250                                      | E08-E13                                                                            |
| Systemic rheumatologic disease | 710, 714, 725                            | M05, M06, M08, M30-36                                                              |
| Prior transplant               | V42                                      | Z94                                                                                |
| Liver disease                  | 571, 5722, 5723, 5724, 5728              | K700, K702-K709, K713, K714, K715, K717, K721, K729, K73, K74, K766, K767          |
| Cardiovascular disease         | 410, 412, 428, 430-438, 441, 443.9, V434 | I21-I25, I50, I67.81, I67.82, I71, I73.9, Z95.1, Z95.5, Z95.8, Z95.9, I60-I66, G45 |
